# Supplementary material for: Automated crystal characterization with a fast neighborhood graph analysis method
Source: Royal Society of Chemistry journal article supplement (doi:10.1039/c8sm00960k), 2018-01-01
Supplement: c8sm00960k1.pdf [file c8sm00960k1.pdf]

**Supplementary information for “Automated crystal characterization with a fast  
Neighborhood Graph Analysis method”**

Wesley F. Reinhart and Athanassios Z. Panagiotopoulos

*Department of Chemical and Biological Engineering, Princeton University,  
Princeton, NJ 08544, USA*

(Dated: 9 May 2018)

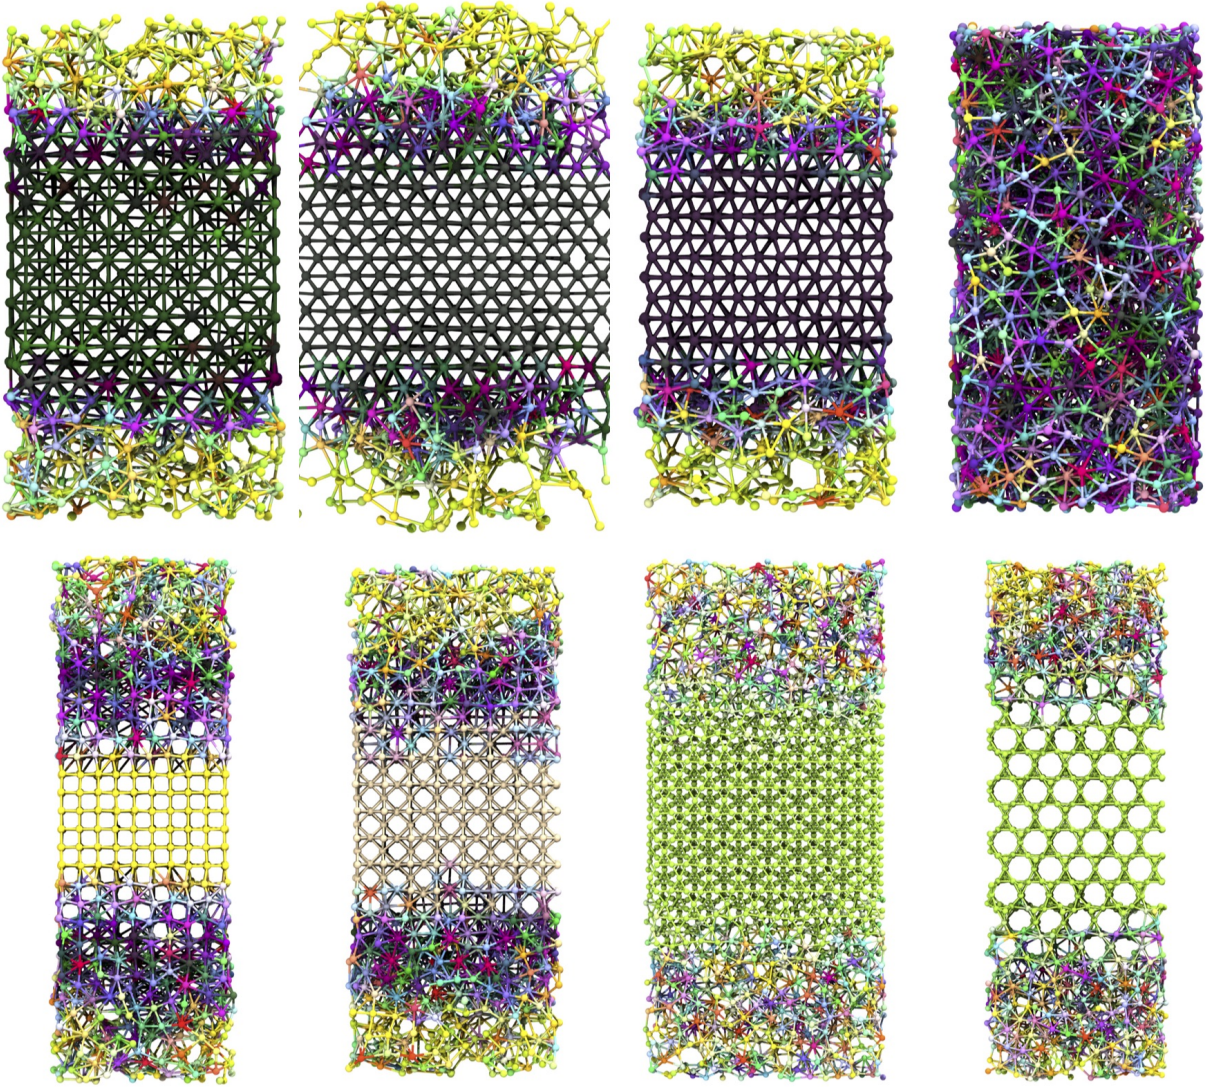

FIG. S1: Snapshots of thermalized crystal lattices colored according to the diffusion map of Fig. 3, built from first-degree neighborhood graphs. Top row: BCC, FCC, HCP, liquid. Bottom row: SC, perovskite, CT, HT.



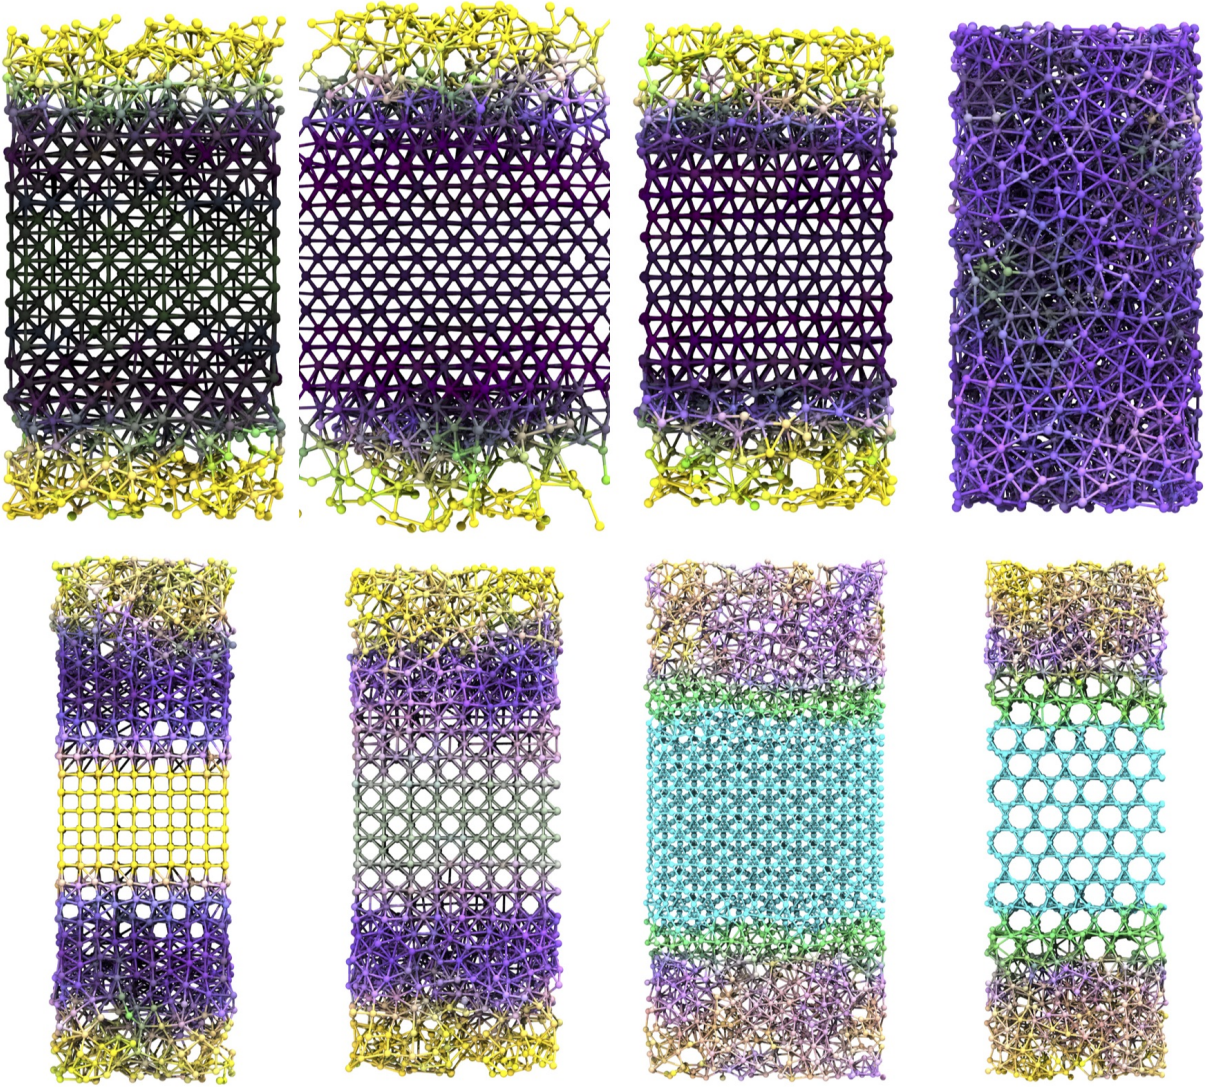

FIG. S2: Snapshots of thermalized crystal lattices colored according to the diffusion map of Fig. 4, built from third-degree neighborhood graphs. Top row: BCC, FCC, HCP, liquid. Bottom row: SC, perovskite, CT, HT.
